# Supplementary material for: Retargeted Foamy Virus Vectors Integrate Less Frequently Near Proto-oncogenes
Source: PubMed Central journal article supplement (PMC5095648; doi:10.1038/srep36610), 2016-11-04
Supplement: srep36610-s1.pdf [file srep36610-s1.pdf]

**Supplementary information:**

**Retargeted Foamy Virus Vectors Integrate Less Frequently Near Proto-oncogenes**

Jonah D. Hocum <sup>1</sup>, Ian Linde <sup>1</sup>, Dustin T. Rae <sup>1</sup>, Casey P. Collins <sup>1</sup>, Lindsay K. Matern <sup>1</sup>,  
and Grant D. Trobridge <sup>1,2</sup>

<sup>1</sup>Department of Pharmaceutical Sciences, Washington State University, Spokane, WA,  
United States, 99210; <sup>2</sup>School of Molecular Biosciences, Washington State University,  
Pullman, WA, United States, 99164

# Figure S1

a

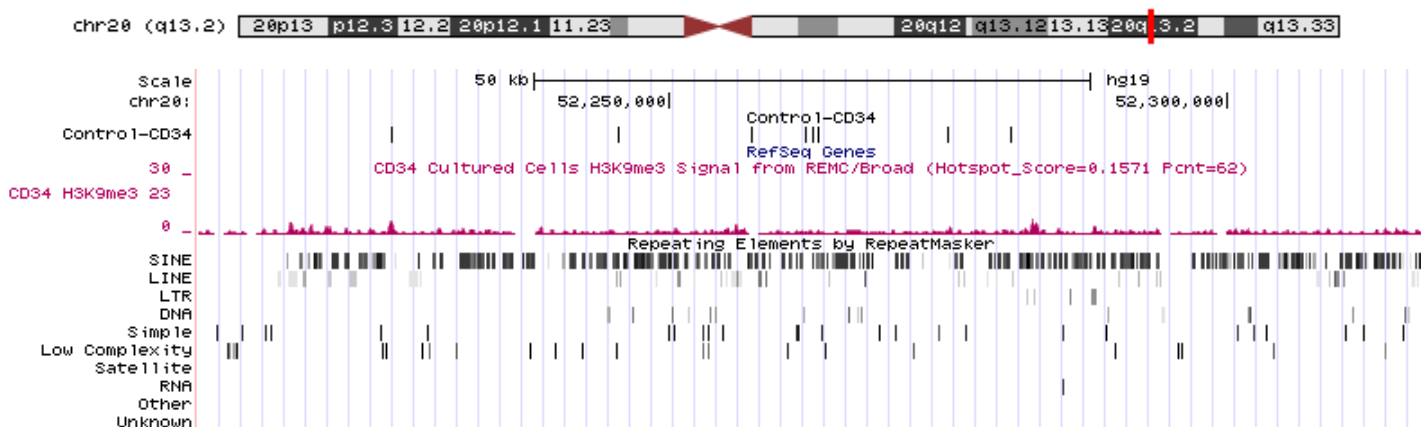

b

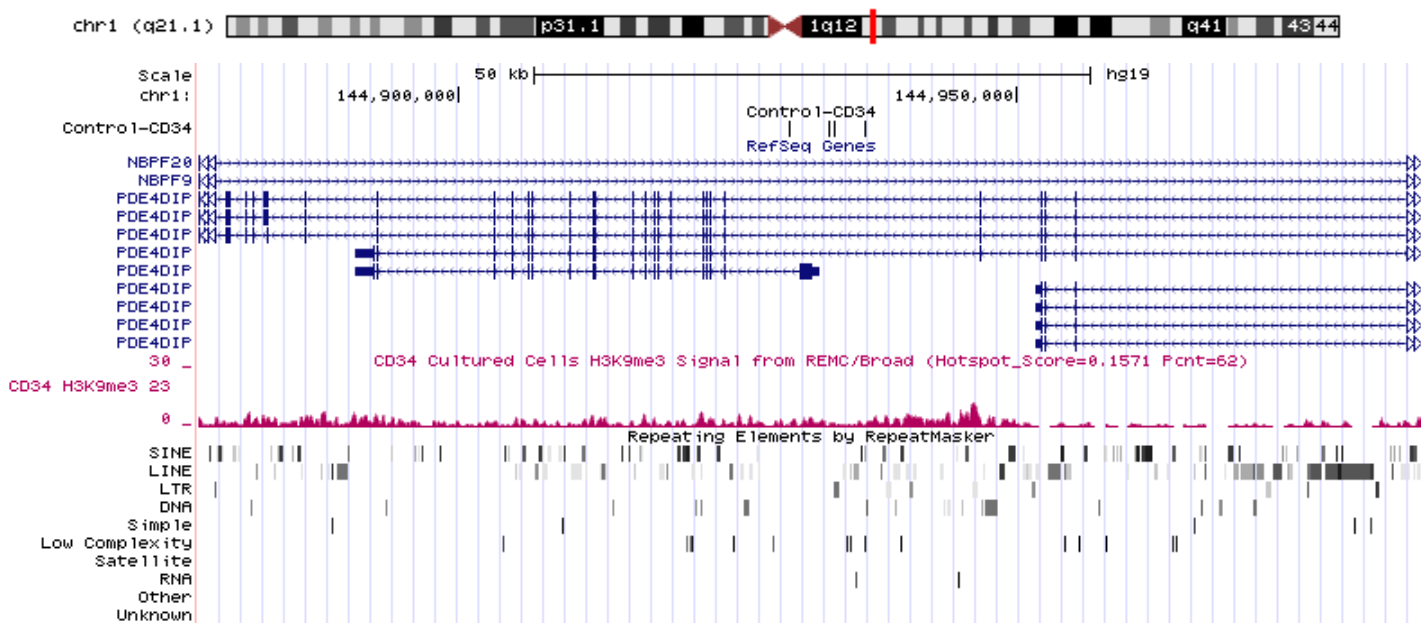

c

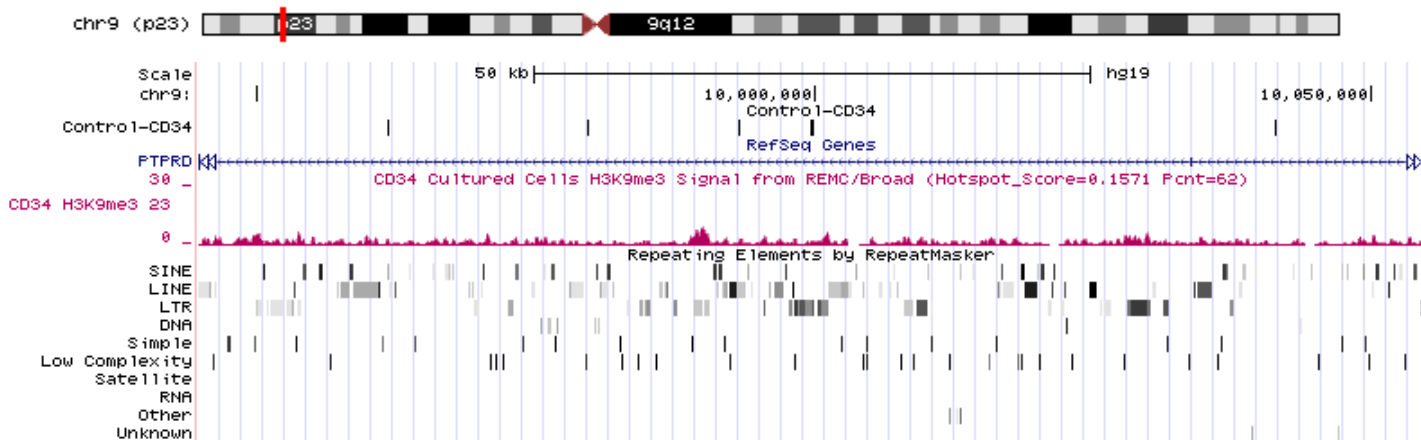

**d**chr14 (q11.2) p13 p12 p11.2 **11.2** 14q12 21.1 24.3 31.3 32.2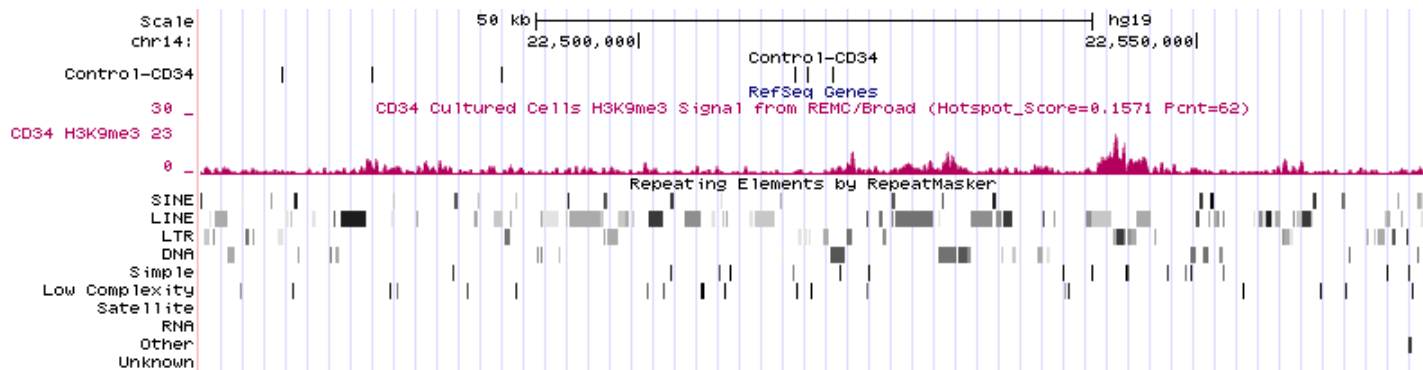**e**chr20 (q13.2) 20p13 p12.3 12.2 20p12.1 11.23 **11.23** 20q12 q13.12 13.15 20q 5.2 q13.33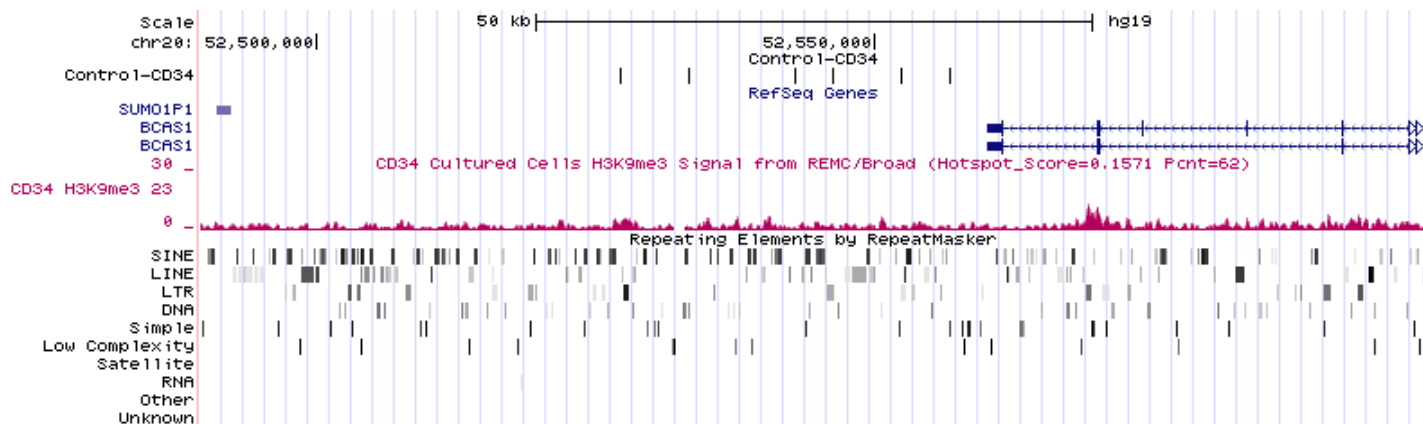

**f**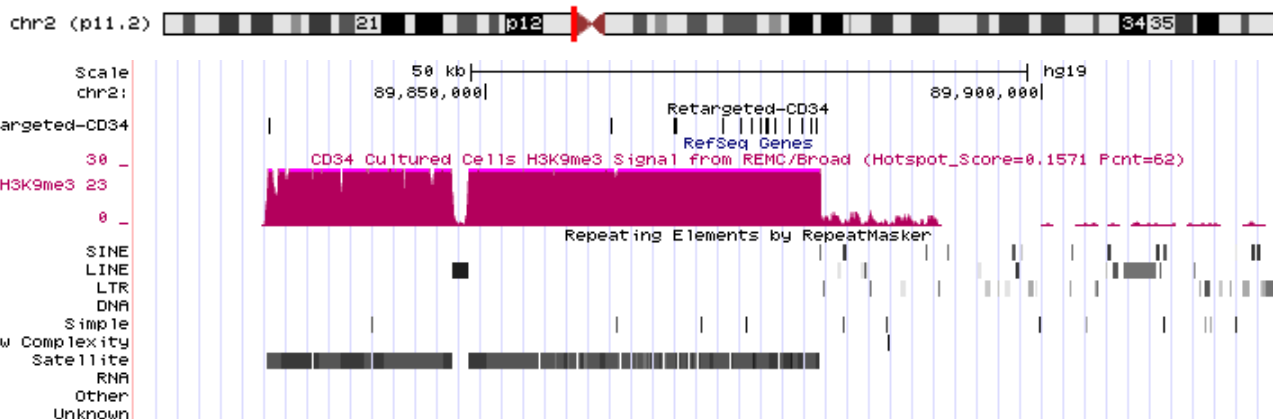**g**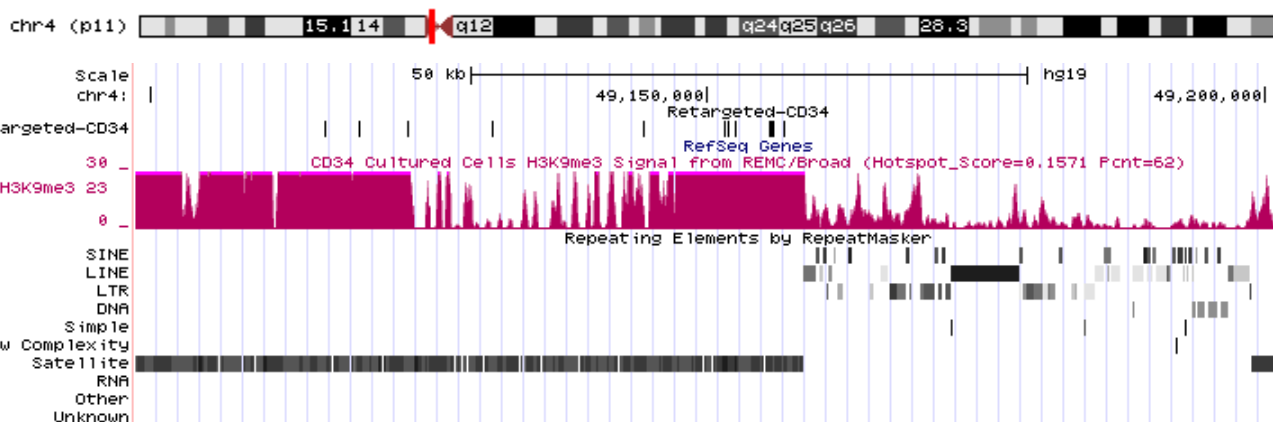**h**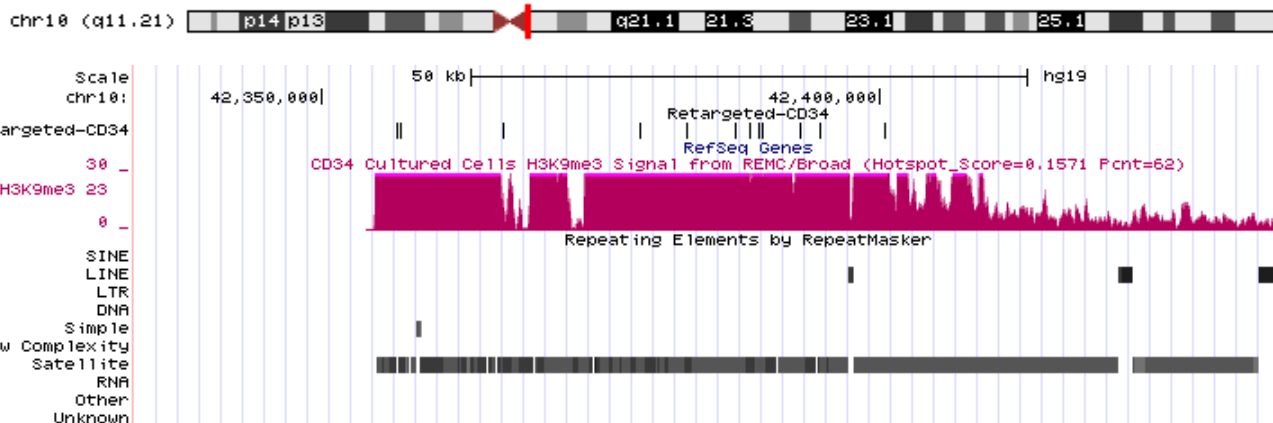

i

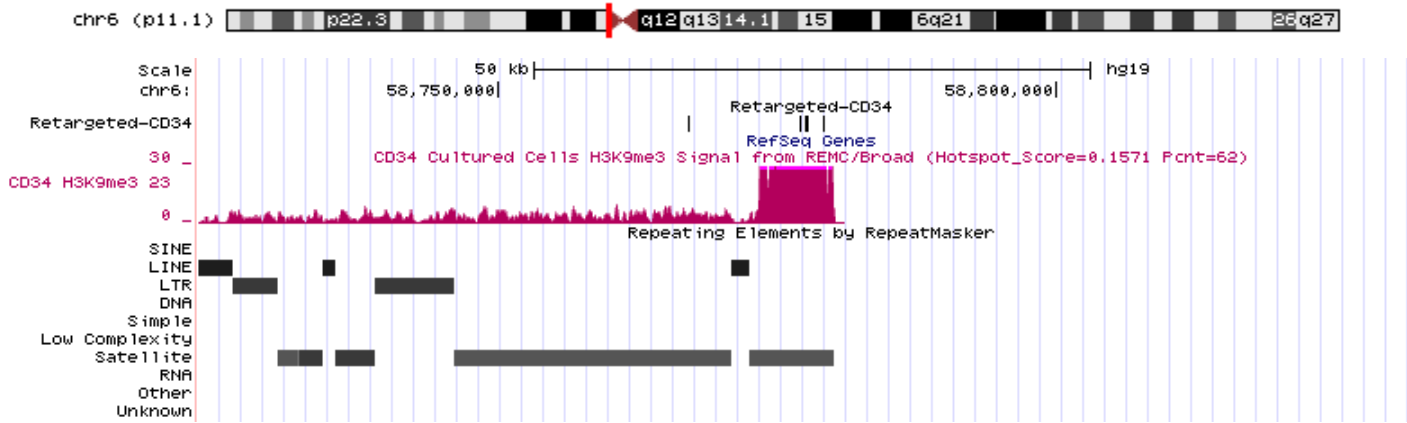

j

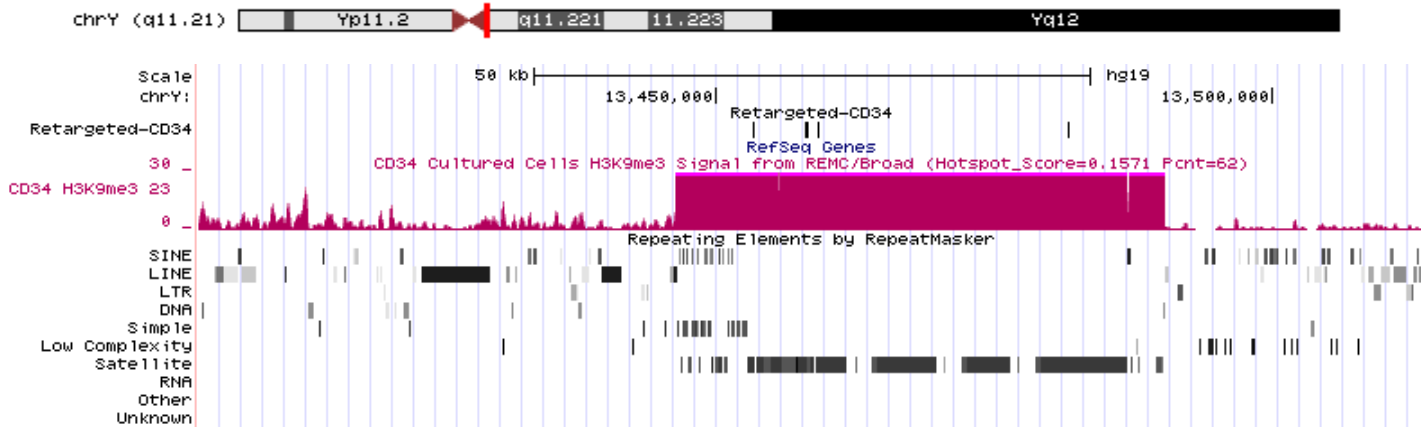

**Figure S1. Example hotspots with RISs nearest to each other observed in CD34<sup>+</sup> cells.** Plotted in the UCSC genome browser. **(a-e)** Control FV example hotspots. **(f-j)** Retargeted FV example hotspots. The following UCSC genome browser tracks are also displayed: RefSeq Genes, CD34 Cultured Cells H3K9me3 Signal from REMC/Broad, and RepeatMasker. RIS, retroviral vector integration site.

**Figure S2**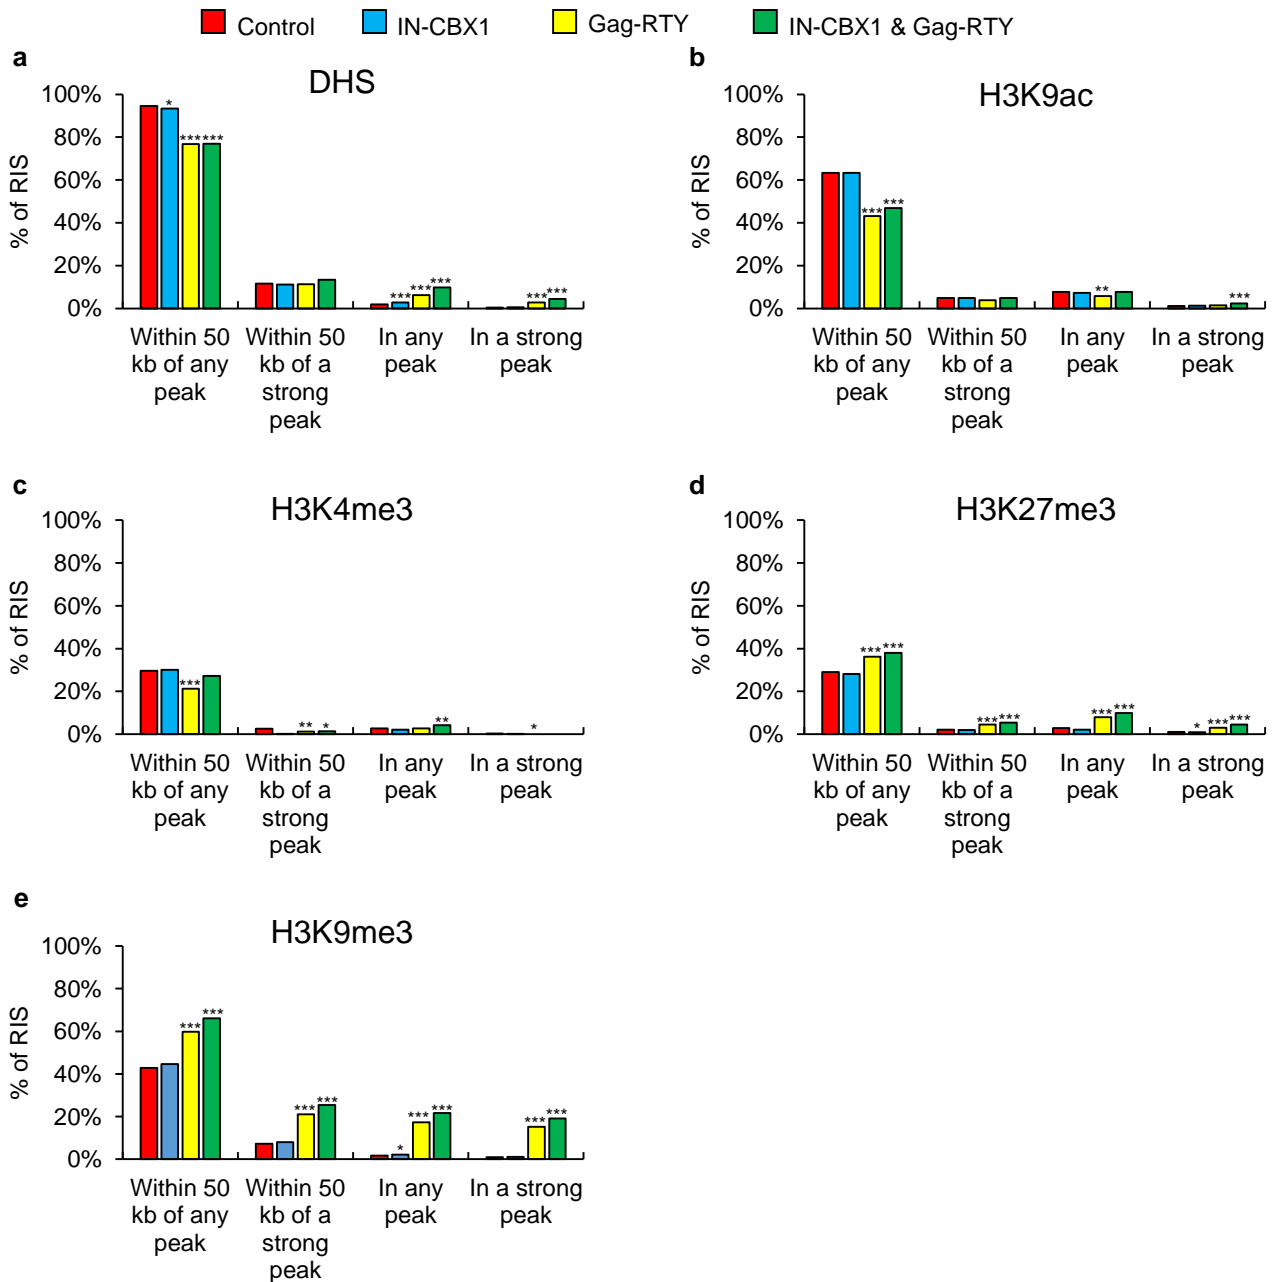

**Figure S2. Proximity of FV integration sites in IMR90 cells to (a) DHS, (b) H3K9ac, (c) H3K4me3, (d) H3K27me3, and (e) H3K9me3.** H3K9ac and H3K4me3 are associated with active genes and H3K27me3 is associated with inactive genes. (e) Is a duplicate representation of the IMR90 data from Figure 3a. DHS, DNase I hypersensitive sites; H3K9ac, acetylated lysine 9 of histone H3 sites; H3K4me3, tri-methylated lysine 4 of H3 histone sites; H3K27me3, tri-methylated lysine 27 of H3 histone sites; H3K9me3, tri-methylated lysine 9 of histone H3 sites. RIS, retroviral vector integration sites.  
 \* statistically significant at  $p < 0.05$  compared to control vector.  
 \*\* statistically significant at  $p < 0.01$  compared to control vector.  
 \*\*\* statistically significant at  $p < 0.001$  compared to control vector.

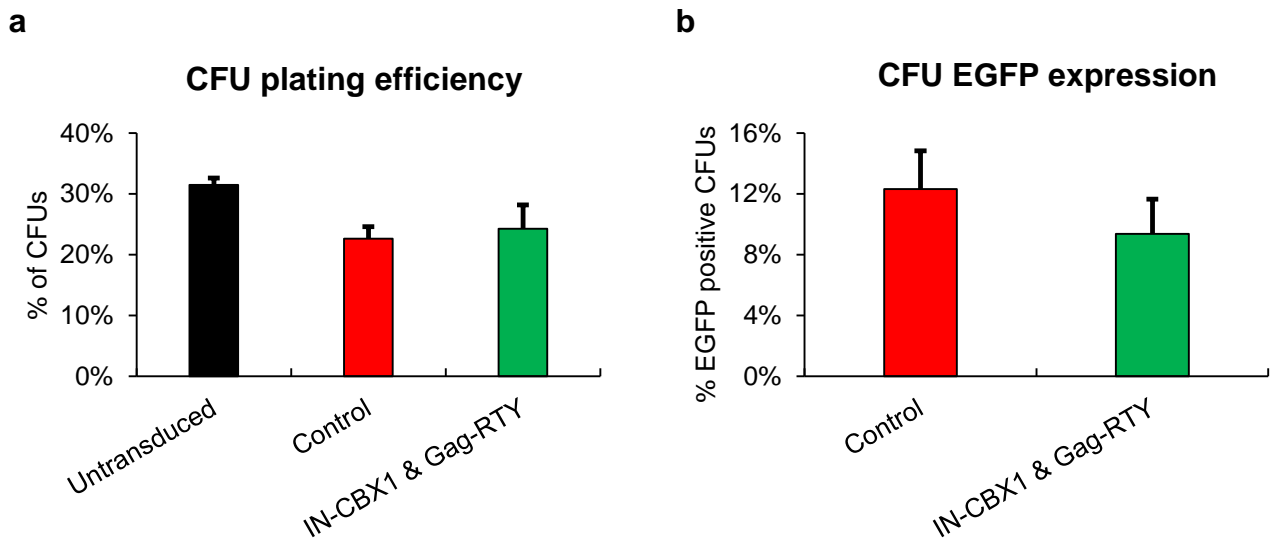

**Figure S3. Efficient transduction of human CD34+ colony forming units.** 2000 cells from each sample were plated in triplicate in Methocult™ H4230. A mean of 453 colonies were counted for the control FV group and a mean of 486 colonies were counted for the retargeted FV group. (a) Plating efficiency was calculated as the number of CFUs divided by the number of cells originally plated (mean + SEM). (b) EGFP positive CFUs were determined by fluorescence microscopy (mean + SEM). CFU; colony forming unit.

**Table S1. Retargeted FV RIS near highly enriched H3K9me3 regions are farther away from proto-oncogene TSS.**

|                                                              | <b>% &lt; 50 kb from proto-oncogene TSS</b> | <b>% &lt; 500 kb from proto-oncogene TSS</b> | <b>Mean distance</b> | <b>Standard deviation</b> |
|--------------------------------------------------------------|---------------------------------------------|----------------------------------------------|----------------------|---------------------------|
| <b>RIS &lt; 50 kb from strong H3K9me3 peaks</b>              | 0.49 %                                      | 3.66 %                                       | 4.33 Mbp             | 6.62 Mbp                  |
| <b>RIS <math>\geq</math> 50 kb from strong H3K9me3 peaks</b> | 2.85 %                                      | 19.48 %                                      | 3.41 Mbp             | 4.35 Mbp                  |

RIS, retroviral vector integration sites; TSS, transcription start sites.



**Table S2. Clones constituting 1 % or more of the total capture frequency.**

| Vector            | Cell line         | Locus          | Capture frequency | Within a strong H3K9me3 peak? | Within a satellite repeat? | Distance to nearest RefSeq TSS | Distance to nearest proto-oncogene TSS |
|-------------------|-------------------|----------------|-------------------|-------------------------------|----------------------------|--------------------------------|----------------------------------------|
| IN-CBX1           | IMR90             | chr7:43058805  | 1.98 %            | No                            | No                         | 87 kb, MRPL32                  | 1306 kb, CAMK2B                        |
| Vector            | Cell line         | Locus          | Capture frequency | Within a strong H3K9me3 peak? | Within a satellite repeat? | Distance to nearest RefSeq TSS | Distance to nearest proto-oncogene TSS |
| Gag-RTY           | IMR90             | chr21:25198348 | 1.33 %            | No                            | No                         | 1606 kb, NCRNA00158            | 7733 kb, TIAM1                         |
| Vector            | Cell line         | Locus          | Capture frequency | Within a strong H3K9me3 peak? | Within a satellite repeat? | Distance to nearest RefSeq TSS | Distance to nearest proto-oncogene TSS |
| IN-CBX1 & Gag-RTY | IMR90             | chr16:34372309 | 1.73 %            | No                            | No                         | 32 kb, UBE2MP1                 | 3006 kb, ITGAX                         |
| IN-CBX1 & Gag-RTY | IMR90             | chr6:58776968  | 1.56 %            | Yes                           | Yes                        | 489 kb, GUSBL2                 | 2269 kb, DST                           |
| IN-CBX1 & Gag-RTY | IMR90             | chr5:62739196  | 1.34 %            | No                            | No                         | 518 kb, HTR1A                  | 3857 kb, PDE4D                         |
| IN-CBX1 & Gag-RTY | IMR90             | chr21:11115641 | 1.21 %            | Yes                           | No                         | 17 kb, BAGE                    | 21816 kb, TIAM1                        |
| IN-CBX1 & Gag-RTY | IMR90             | chrX:121344342 | 1.19 %            | No                            | No                         | 974 kb, GRIA3                  | 2517 kb, SEPT6                         |
| IN-CBX1 & Gag-RTY | IMR90             | chrX:130396526 | 1.18 %            | No                            | No                         | 27 kb, IGSF1                   | 1152 kb, ELF4                          |
| IN-CBX1 & Gag-RTY | IMR90             | chr4:53771317  | 1.15 %            | No                            | No                         | 43 kb, RASL11B                 | 473 kb, FIP1L1                         |
| IN-CBX1 & Gag-RTY | IMR90             | chrX:7856849   | 1.14 %            | No                            | No                         | 39 kb, PNPLA4                  | 2732 kb, MID1                          |
| IN-CBX1 & Gag-RTY | IMR90             | chr9:23671123  | 1.13 %            | No                            | No                         | 155 kb, ELAVL2                 | 1677 kb, CDKN2A                        |
| IN-CBX1 & Gag-RTY | IMR90             | chr3:76674593  | 1.06 %            | No                            | No                         | 415 kb, ROBO2                  | 15437 kb, FHIT                         |
| Vector            | Cell line         | Locus          | Capture frequency | Within a strong H3K9me3 peak? | Within a satellite repeat? | Distance to nearest RefSeq TSS | Distance to nearest proto-oncogene TSS |
| IN-CBX1 & Gag-RTY | CD34 <sup>+</sup> | chr2:43257083  | 1.83 %            | No                            | No                         | 197 kb, ZFP36L2                | 197 kb, ZFP36L2                        |
| IN-CBX1 & Gag-RTY | CD34 <sup>+</sup> | chr5:101508953 | 1.47 %            | No                            | No                         | 123 kb, SLCO4C1                | 5238 kb, LNPEP                         |
| IN-CBX1 & Gag-RTY | CD34 <sup>+</sup> | chr5:6838298   | 1.27 %            | No                            | No                         | 10 kb, MIR4278                 | 5066 kb, CTNND2                        |
| IN-CBX1 & Gag-RTY | CD34 <sup>+</sup> | chr19:19165003 | 1.18 %            | No                            | No                         | 10 kb, SLC25A42                | 138 kb, LOC729991-MEF2B                |
| IN-CBX1 & Gag-RTY | CD34 <sup>+</sup> | chr4:39172326  | 1.07 %            | No                            | No                         | 12 kb, WDR19                   | 507 kb, KLF3                           |
| IN-CBX1 & Gag-RTY | CD34 <sup>+</sup> | chr9:97397671  | 1.03 %            | No                            | No                         | 5 kb, FBP1                     | 682 kb, FANCC                          |
| IN-CBX1 & Gag-RTY | CD34 <sup>+</sup> | chr2:221480576 | 1.03 %            | No                            | No                         | 709 kb, MIR4268                | 1630 kb, FEV                           |
| IN-CBX1 & Gag-RTY | CD34 <sup>+</sup> | chr1:4850226   | 1.03 %            | No                            | No                         | 135 kb, AJAP1                  | 1409 kb, RPL22                         |

TSS, transcription start site.
